# Supplementary material
Source: PubMed Central journal article supplement (PMC3129372)
Supplement: NIHMS269888-supplement.pdf [file NIHMS269888-supplement.pdf]

Supporting Information - Note: Analysis of OT group data at Session 1 matched to AR data

At Session 1, the mean number of runs included in the analysis differed significantly between OT and AR groups. (See Table 1, Number of usable runs, Session 1.) To examine whether the suprathreshold activations for the letter > false font contrast in the posterior dorsal region observed in the OT group, but not in the AR group, was due to the greater statistical power for the OT group data as compared to the AR group data, a supplementary analysis was conducted for the OT group reducing the number of runs included in the analysis to match the number of runs included for the AR group at Session 1. Six runs with the lowest mean absolute motion in the OT group were selected to be excluded so that the two groups would also be better matched on absolute motion (number of usable runs:  $M = 3.0$ ,  $SD = 0.82$ ; absolute motion (mm):  $M = 0.21$ ,  $SD = 0.05$ ). No more than two runs were excluded per participant so that there were at least two usable runs for each participant. This procedure resulted in the two groups matched on the number of usable runs ( $t(12) = 0.0$ ,  $p = 1.0$ ) and absolute motion ( $t(12) = 0.69$ ,  $p = 0.50$ ).

The single-subject multiple-run analysis for each participant and the group analysis were conducted as described in the methods section. Supporting Information – Figure 1 shows the statistical images of the matched analysis thresholded at  $Z = 1.96$ . As indicated by circles, the matched analysis revealed activations in the bilateral posterior dorsal regions similar in location to the activations observed in the unmatched analysis. Therefore, the activations found in the bilateral posterior dorsal regions in the OT group, but not AR group, at Session 1 was not attributable to the difference in the statistical power due to the larger number of runs included in the analysis of the OT group.

Supporting Information - Figure 1. Letter activations in the OT group at Session 1. The number of runs and motion in the data were matched to those in the AR group at Session 1. The circles indicate activations in the posterior dorsal region.

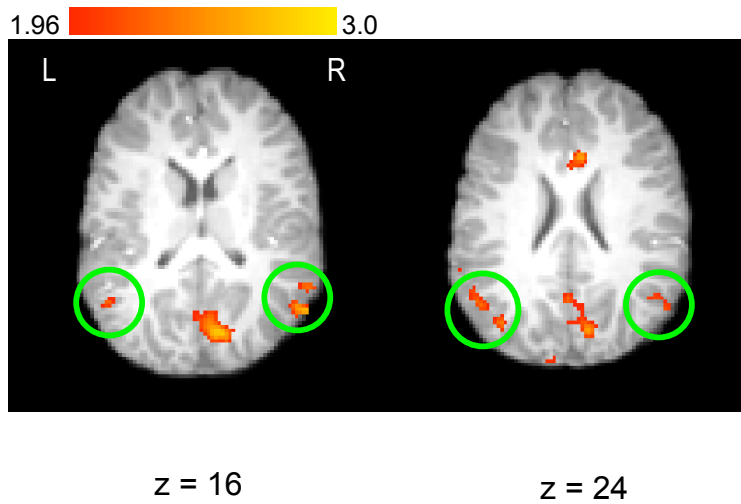

Supporting Information - Table 1. Regions showing activations for the letter > false font contrast in adults

| Region                                       | Volume<br>(voxels) | Peak Z | p       | MNI coordinates |     |     |
|----------------------------------------------|--------------------|--------|---------|-----------------|-----|-----|
|                                              |                    |        |         | x               | y   | z   |
| Frontal lobe                                 |                    |        |         |                 |     |     |
| L Superior frontal gyrus                     | 183                | 2.79   | < 0.005 | -14             | 34  | 58  |
| L Paracingulate gyrus                        | 38                 | 2.32   | < 0.025 | -4              | 48  | 24  |
| L Frontal orbital cortex                     | 32                 | 2.96   | < 0.005 | -58             | 26  | -10 |
| L Frontal pole                               | 13                 | 2.48   | < 0.01  | -14             | 62  | 32  |
| R Frontal pole                               | 233                | 3.25   | < 0.001 | 16              | 40  | 58  |
| R Precentral gyrus                           | 29                 | 2.65   | < 0.005 | 66              | 8   | 6   |
| L/R Frontal medial cortex                    | 48                 | 2.42   | < 0.01  | -4              | 46  | -22 |
| L/R Subcallosal cortex                       | 22                 | 2.60   | < 0.005 | -2              | 28  | -30 |
| L/R Supplementary motor cortex               | 21                 | 2.42   | < 0.01  | 0               | -4  | 62  |
| Temporal lobe                                |                    |        |         |                 |     |     |
| L Middle temporal gyrus, supramarginal gyrus | 667                | 3.62   | < 0.001 | -68             | -42 | 2   |
| L Middle temporal, inferior temporal gyrus   | 323                | 3.15   | < 0.001 | -68             | -16 | -24 |
| L Inferior temporal gyrus                    | 38                 | 2.80   | < 0.005 | -50             | -10 | -44 |
| L Temporal pole                              | 29                 | 2.69   | < 0.005 | -48             | 4   | -44 |
| R Middle temporal gyrus                      | 106                | 3.05   | < 0.005 | 72              | -20 | -26 |
|                                              | 12                 | 2.22   | < 0.025 | 68              | -6  | -14 |
| Frontoparietal operculum                     |                    |        |         |                 |     |     |
| L Central opercular cortex                   | 81                 | 2.88   | < 0.005 | -54             | 2   | 2   |
|                                              | 19                 | 2.37   | < 0.01  | -32             | 0   | 16  |
| R Central opercular cortex                   | 25                 | 2.21   | < 0.025 | 56              | -8  | 8   |
| Parietal lobe                                |                    |        |         |                 |     |     |
| L Precuneus                                  | 221                | 2.74   | < 0.005 | -8              | -56 | 30  |
| L Postcentral gyrus                          | 13                 | 2.40   | < 0.01  | -58             | -10 | 48  |
| R Postcentral gyrus                          | 52                 | 2.99   | < 0.005 | 40              | -30 | 72  |
|                                              | 30                 | 3.02   | < 0.005 | 48              | -14 | 62  |
| R Supramarginal gyrus                        | 16                 | 2.20   | < 0.025 | 66              | -46 | 40  |
| Occipital lobe                               |                    |        |         |                 |     |     |
| L Lateral occipital cortex                   | 139                | 2.72   | < 0.005 | -52             | -74 | 32  |
|                                              | 29                 | 2.27   | < 0.025 | -58             | -66 | 20  |
| L Occipital pole                             | 41                 | 2.49   | < 0.01  | -6              | -94 | 16  |
| L Lateral occipital cortex, angular gyrus    | 11                 | 2.23   | < 0.025 | -40             | -62 | 22  |
| R Lateral occipital cortex, angular gyrus    | 167                | 2.93   | < 0.005 | 64              | -60 | 14  |

Supporting Information - Table 2. Regions showing activations for the letter > false font contrast in OT group at Session 1

| Region                                                   | Volume<br>(voxels) | Peak Z | p       | MNI coordinates |     |     |
|----------------------------------------------------------|--------------------|--------|---------|-----------------|-----|-----|
|                                                          |                    |        |         | x               | y   | z   |
| Frontal lobe                                             |                    |        |         |                 |     |     |
| L Frontal orbital cortex                                 | 170                | 2.63   | < 0.005 | -32             | 24  | -18 |
|                                                          | 16                 | 2.50   | < 0.01  | -26             | 18  | -24 |
| L Precentral gyrus                                       | 161                | 3.04   | < 0.005 | -16             | -22 | 68  |
| L Frontal medial cortex                                  | 13                 | 2.67   | < 0.005 | -6              | 50  | -20 |
|                                                          | 46                 | 2.54   | < 0.01  | -4              | 40  | -32 |
| R Frontal orbital cortex                                 | 85                 | 2.78   | < 0.005 | 36              | 22  | -14 |
|                                                          | 23                 | 2.25   | < 0.025 | 42              | 30  | 0   |
| R Supplementary motor cortex                             | 33                 | 2.50   | < 0.01  | 12              | -6  | 46  |
| L/R Subcallosal cortex                                   | 32                 | 2.39   | < 0.01  | 4               | 12  | -18 |
|                                                          | 15                 | 2.16   | < 0.025 | -4              | 6   | -20 |
| Temporal lobe                                            |                    |        |         |                 |     |     |
| L Inferior temporal gyrus                                | 27                 | 2.59   | < 0.005 | -54             | -2  | -40 |
| L Middle temporal gyrus                                  | 22                 | 2.25   | < 0.025 | -54             | -60 | 2   |
| L Superior temporal gyrus                                | 10                 | 2.08   | < 0.025 | -58             | -38 | 2   |
| R Superior temporal, middle temporal gyrus               | 327                | 2.72   | < 0.005 | 54              | -22 | -10 |
| R Temporal pole                                          | 24                 | 2.30   | < 0.025 | 32              | 8   | -28 |
| R Superior temporal gyrus                                | 21                 | 2.29   | < 0.025 | 68              | -34 | 8   |
| R Inferior temporal gyrus                                | 10                 | 2.23   | < 0.025 | 48              | 0   | -40 |
| Parietal lobe                                            |                    |        |         |                 |     |     |
| L Supramarginal gyrus                                    | 25                 | 2.46   | < 0.01  | -64             | -44 | 22  |
| L Superior parietal lobule                               | 22                 | 2.27   | < 0.025 | -24             | -48 | 68  |
| R Angular gyrus                                          | 101                | 2.50   | < 0.01  | 60              | -52 | 14  |
| R Precuneous cortex                                      | 59                 | 2.61   | < 0.005 | 24              | -58 | 18  |
| R Posterior cingulate gyrus                              | 24                 | 2.17   | < 0.025 | 14              | -34 | 44  |
|                                                          | 10                 | 2.13   | < 0.025 | 8               | -20 | 44  |
| R Superior parietal lobule                               | 13                 | 2.22   | < 0.025 | 26              | -48 | 56  |
| R Supramarginal gyrus                                    | 12                 | 2.11   | < 0.025 | 66              | -40 | 48  |
| L/R Precuneous cortex                                    | 1197               | 2.78   | < 0.005 | -4              | -58 | 54  |
| Occipital lobe                                           |                    |        |         |                 |     |     |
| L Lateral occipital cortex, supramarginal, angular gyrus | 166                | 2.52   | < 0.01  | -42             | -66 | 18  |
| R Lateral occipital cortex                               | 66                 | 2.42   | < 0.01  | 44              | -60 | 26  |
| R Occipital pole                                         | 11                 | 2.25   | < 0.025 | 14              | -94 | 16  |
| L/R Supracalcarine, intracalcarin cortex, precuneus      | 62                 | 2.27   | < 0.025 | -2              | -68 | 16  |
| Subcortical                                              |                    |        |         |                 |     |     |
| R Hippocampus                                            | 25                 | 2.31   | < 0.025 | 20              | -12 | -16 |

Supporting Information - Table 3. Regions showing activations for the letter > false font contrast in AR group at Session 1

| Region                 | Volume<br>(voxels) | Peak Z | p       | MNI coordinates |    |     |
|------------------------|--------------------|--------|---------|-----------------|----|-----|
|                        |                    |        |         | x               | y  | z   |
| Frontal lobe           |                    |        |         |                 |    |     |
| L Middle frontal gyrus | 33                 | 2.23   | < 0.025 | -44             | 30 | 42  |
| R Middle frontal gyrus | 175                | 2.58   | < 0.005 | 38              | 24 | 52  |
| R Frontal pole         | 15                 | 2.27   | < 0.025 | 42              | 50 | 28  |
| Temporal lobe          |                    |        |         |                 |    |     |
| L Temporal pole        | 32                 | 2.61   | < 0.005 | -38             | 6  | -24 |

Supporting Information - Table 4. Regions showing activations for the letter > false font contrast in OT group at Session 2

| Region                                    | Volume<br>(voxels) | Peak Z | p       | MNI coordinates |     |     |
|-------------------------------------------|--------------------|--------|---------|-----------------|-----|-----|
|                                           |                    |        |         | x               | y   | z   |
| Frontal lobe                              |                    |        |         |                 |     |     |
| L Middle frontal gyrus                    | 33                 | 2.33   | < 0.01  | -34             | 16  | 52  |
| R Frontal pole                            | 112                | 2.76   | < 0.005 | 50              | 50  | -16 |
| Temporal lobe                             |                    |        |         |                 |     |     |
| L Temporal pole                           | 42                 | 2.44   | < 0.01  | -30             | 26  | -36 |
| L Middle temporal gyrus                   | 33                 | 2.19   | < 0.025 | -66             | -42 | -12 |
| R Middle temporal gyrus                   | 91                 | 2.34   | < 0.01  | 72              | -24 | -18 |
| R Temporal pole                           | 16                 | 2.33   | = .01   | 60              | 6   | -40 |
| Parietal lobe                             |                    |        |         |                 |     |     |
| L Postcentral gyrus                       | 13                 | 2.32   | < 0.025 | -40             | -34 | 74  |
| L/R Precuneous cortex                     | 139                | 2.38   | < 0.01  | 4               | -58 | 32  |
| Occipital lobe                            |                    |        |         |                 |     |     |
| L Lateral occipital cortex, angular gyrus | 1527               | 2.89   | < 0.005 | -42             | -76 | 46  |
| R Occipital pole                          | 28                 | 2.11   | < 0.025 | 4               | -94 | 30  |
| R Lateral occipital cortex                | 24                 | 2.25   | < 0.025 | 56              | -68 | 38  |
| R Lateral occipital cortex, angular gyrus | 17                 | 2.25   | < 0.025 | 64              | -60 | 28  |

Supporting Information - Table 5. Regions showing activations for the letter > false font contrast in AR group at Session 2

| Region                                                 | Volume (voxels) | Peak Z | p       | MNI coordinates |     |     |
|--------------------------------------------------------|-----------------|--------|---------|-----------------|-----|-----|
|                                                        |                 |        |         | x               | y   | z   |
| Frontal lobe                                           |                 |        |         |                 |     |     |
| L Middle frontal, inferior frontal gyrus, frontal pole | 652             | 2.75   | < 0.005 | -40             | 34  | 18  |
| L Precentral gyrus                                     | 57              | 2.48   | < 0.01  | -42             | 4   | 26  |
| L Frontal pole                                         | 35              | 2.23   | < 0.025 | -26             | 50  | -14 |
|                                                        | 30              | 2.13   | < 0.025 | -36             | 64  | -4  |
| L Middle frontal gyrus                                 | 33              | 2.21   | < 0.025 | -36             | 10  | 40  |
| R Middle frontal, superior frontal gyrus, frontal pole | 563             | 2.60   | < 0.005 | 32              | 30  | 32  |
| R Frontal pole                                         | 125             | 2.65   | < 0.005 | 28              | 64  | -10 |
| R Precentral gyrus                                     | 19              | 2.17   | < 0.025 | 36              | 0   | 36  |
| L/R Anterior cingulate, paracingulate gyrus            | 1128            | 2.84   | < 0.005 | -4              | 30  | 30  |
| L/R Anterior cingulate gyrus                           | 86              | 2.54   | < 0.01  | 6               | 34  | 8   |
| Temporal lobe                                          |                 |        |         |                 |     |     |
| L Middle temporal, supramarginal gyrus                 | 297             | 2.77   | < 0.005 | -68             | -26 | -4  |
| Parietal lobe                                          |                 |        |         |                 |     |     |
| L Angular gyrus                                        | 16              | 2.31   | < 0.025 | -54             | -54 | 50  |
| R Supramarginal, angular gyrus                         | 120             | 2.38   | < 0.01  | 54              | -46 | 38  |
| R Precuneous cortex                                    | 92              | 2.64   | < 0.005 | 12              | -64 | 42  |
| R Postcentral gyrus                                    | 34              | 2.50   | < 0.01  | 18              | -36 | 58  |
| Occipital lobe                                         |                 |        |         |                 |     |     |
| L Occipital pole                                       | 37              | 2.26   | < 0.01  | -10             | -90 | 10  |
| R Lingual gyrus                                        | 220             | 2.69   | < 0.005 | 8               | -86 | -16 |

Supporting Information - Table 6. Regions showing differences in activations between OT and AR groups for letter > false font contrast at Session 1

| Region                        | Volume<br>(voxels) | Peak Z | p        | MNI coordinates |      |     |
|-------------------------------|--------------------|--------|----------|-----------------|------|-----|
|                               |                    |        |          | x               | y    | z   |
| <b>OT group &gt; AR group</b> |                    |        |          |                 |      |     |
| Frontal lobe                  |                    |        |          |                 |      |     |
| L Frontal orbital cortex      | 38                 | 3.05   | < 0.005  | -40             | 26   | -16 |
| L Inferior frontal gyrus      | 21                 | 3.17   | < 0.001  | -48             | 24   | 16  |
|                               | 13                 | 3.22   | < 0.001  | -58             | 26   | 8   |
| R Inferior frontal gyrus      | 29                 | 3.20   | < 0.001  | 56              | 28   | 20  |
| R Superior frontal gyrus      | 12                 | 2.88   | < 0.005  | 12              | 4    | 66  |
| R Anterior cingulate gyrus    | 12                 | 2.82   | < 0.005  | 10              | -4   | 44  |
| R Frontal orbital cortex      | 10                 | 2.81   | < 0.005  | 38              | 28   | -14 |
| L/R Precentral gyrus          | 981                | 4.19   | < 0.0001 | -10             | -20  | 72  |
| Temporal lobe                 |                    |        |          |                 |      |     |
| L Inferior temporal gyrus     | 76                 | 3.39   | < 0.0005 | -56             | -46  | -12 |
| L Middle temporal gyrus       | 11                 | 2.81   | < 0.005  | -62             | -8   | -8  |
| R Middle temporal gyrus       | 14                 | 2.80   | < 0.005  | 52              | -18  | -10 |
| R Temporal fusiform cortex    | 14                 | 3.26   | < 0.001  | 26              | 0    | -40 |
| R Superior temporal gyrus     | 12                 | 2.83   | < 0.005  | 48              | -32  | 6   |
| Parietal lobe                 |                    |        |          |                 |      |     |
| L Superior parietal lobule    | 335                | 3.46   | < 0.0005 | -24             | -48  | 68  |
| L Supramarginal gyrus         | 111                | 3.22   | < 0.0005 | -64             | -46  | 20  |
| R Superior parietal lobule    | 36                 | 3.01   | < 0.005  | 26              | -50  | 56  |
|                               | 10                 | 2.89   | < 0.005  | 34              | -52  | 44  |
| R Supramarginal gyrus         | 12                 | 2.75   | < 0.005  | 70              | -38  | 14  |
| Occipital lobe                |                    |        |          |                 |      |     |
| L Lateral occipital cortex    | 41                 | 2.90   | < 0.005  | -60             | -64  | -4  |
|                               | 17                 | 2.77   | < 0.005  | -46             | -64  | 16  |
| R Occipital pole              | 18                 | 2.88   | < 0.005  | 10              | -104 | -2  |
| L/R Supracalcarine cortex     | 68                 | 2.83   | < 0.005  | 2               | -68  | 16  |
| Subcortical                   |                    |        |          |                 |      |     |
| L Putamen                     | 42                 | 3.08   | < 0.005  | -20             | -2   | 14  |
| L Thalamus                    | 13                 | 2.89   | < 0.005  | -2              | -14  | 0   |
| R Putamen                     | 618                | 3.65   | < 0.0005 | 20              | 0    | 10  |
| R Amygdala                    | 90                 | 3.02   | < 0.005  | 22              | -12  | -14 |
| <b>AR group &gt; OT group</b> |                    |        |          |                 |      |     |
| Frontal lobe                  |                    |        |          |                 |      |     |
| R Frontal orbital cortex      | 20                 | 3.30   | = 0.0005 | 12              | 30   | -22 |



Supporting Information - Table 7. Regions showing differences in activations between OT and AR groups for letter > false font contrast at Session 2

| Region                        | Volume<br>(voxels) | Peak Z | p        | MNI coordinates |     |     |
|-------------------------------|--------------------|--------|----------|-----------------|-----|-----|
|                               |                    |        |          | x               | y   | z   |
| <b>OT group &gt; AR group</b> |                    |        |          |                 |     |     |
| Occipital lobe                |                    |        |          |                 |     |     |
| L Lateral occipital cortex    | 41                 | 3.09   | < 0.005  | -38             | -78 | 40  |
| <b>AR group &gt; OT group</b> |                    |        |          |                 |     |     |
| Frontal lobe                  |                    |        |          |                 |     |     |
| L Precentral gyrus            | 54                 | 2.96   | < 0.005  | -56             | 4   | 26  |
| L Inferior frontal gyrus      | 20                 | 2.93   | < 0.005  | -36             | 34  | 16  |
| L Frontal pole                | 18                 | 2.73   | < 0.005  | -22             | 54  | 2   |
|                               | 10                 | 2.73   | < 0.005  | -34             | 42  | 22  |
| R Superior frontal gyrus      | 167                | 3.30   | = 0.0005 | 20              | -10 | 62  |
| R Middle frontal gyrus        | 144                | 3.45   | < 0.0005 | 32              | 14  | 28  |
| R Precentral gyrus            | 50                 | 3.07   | < 0.005  | 34              | 0   | 36  |
| R Anterior cingulate cortex   | 15                 | 2.74   | < 0.005  | 4               | 36  | 8   |
| L/R Paracingulate gyrus       | 269                | 3.14   | < 0.001  | 10              | 22  | 38  |
| Temporal lobe                 |                    |        |          |                 |     |     |
| R Planum temporale            | 11                 | 2.93   | < 0.005  | 54              | -22 | 8   |
| Frontoparietal operculum      |                    |        |          |                 |     |     |
| R Frontal operculum cortex    | 37                 | 2.86   | < 0.005  | 42              | 26  | 2   |
| Parietal lobe                 |                    |        |          |                 |     |     |
| L Superior parietal lobule    | 19                 | 2.88   | < 0.005  | -28             | -56 | 54  |
|                               | 12                 | 2.89   | < 0.005  | -28             | -42 | 40  |
|                               |                    |        | <        |                 |     |     |
| R Supramarginal gyrus         | 65                 | 3.38   | 0.0005   | 60              | -20 | 30  |
| R Precuneous cortex           | 53                 | 3.03   | < 0.005  | 12              | -68 | 50  |
| R Postcentral gyrus           | 36                 | 3.21   | < 0.001  | 16              | -42 | 56  |
| Occipital lobe                |                    |        |          |                 |     |     |
| L Occipital pole              | 12                 | 2.93   | < 0.005  | -8              | -94 | 8   |
| R Lateral occipital cortex    | 50                 | 3.17   | < 0.001  | 30              | -64 | 56  |
| R Lingual gyrus               | 37                 | 3.45   | < 0.0005 | 6               | -86 | -16 |

Supporting Information - Table 8. Regions showing differences in activations between Session 1 and Session 2 for letter > false font contrast in OT group

| Region                             | Volume<br>(voxels) | Peak Z | p       | MNI coordinates |     |     |
|------------------------------------|--------------------|--------|---------|-----------------|-----|-----|
|                                    |                    |        |         | x               | y   | z   |
| <b>Session 2 &gt; Session 1</b>    |                    |        |         |                 |     |     |
| Frontal lobe                       |                    |        |         |                 |     |     |
| R Frontal pole                     | 54                 | 2.66   | < 0.005 | 34              | 60  | 4   |
|                                    | 40                 | 2.75   | < 0.005 | 46              | 54  | -18 |
| Temporal lobe                      |                    |        |         |                 |     |     |
| R Temporo-occipital fusiform gyrus | 37                 | 2.71   | < 0.005 | 48              | -38 | -30 |
| <b>Session 1 &gt; Session 2</b>    |                    |        |         |                 |     |     |
| Frontal lobe                       |                    |        |         |                 |     |     |
| L Precentral gyrus                 | 96                 | 2.88   | < 0.005 | -14             | -20 | 66  |
| L Frontal orbital cortex           | 15                 | 2.58   | < 0.005 | -32             | 34  | -10 |
| R Frontal orbital cortex           | 66                 | 2.65   | < 0.005 | 40              | 30  | 0   |
| R Supplementary motor cortex       | 19                 | 2.58   | < 0.005 | 14              | -6  | 44  |
| Temporal lobe                      |                    |        |         |                 |     |     |
| L Temporal pole                    | 24                 | 2.64   | < 0.005 | -46             | 4   | -12 |
| R Temporal pole                    | 35                 | 2.62   | < 0.005 | 40              | 16  | -18 |
| Frontoparietal operculum           |                    |        |         |                 |     |     |
| R Parietal operculum cortex        | 10                 | 2.52   | < 0.01  | 40              | -20 | 22  |
| Parietal lobe                      |                    |        |         |                 |     |     |
| L Precuneus cortex                 | 21                 | 2.60   | < 0.005 | -14             | -60 | 50  |
| R Postcentral gyrus                | 124                | 2.64   | < 0.005 | 18              | -46 | 52  |
| R Precuneus cortex                 | 37                 | 2.67   | < 0.005 | 22              | -58 | 18  |
| R Supramarginal gyrus              | 18                 | 2.80   | < 0.005 | 66              | -38 | 50  |
| Occipital lobe                     |                    |        |         |                 |     |     |
| R Lateral occipital cortex         | 15                 | 2.53   | < 0.01  | 14              | -62 | 62  |
| Subcortical                        |                    |        |         |                 |     |     |
| R Putamen                          | 31                 | 2.68   | < 0.005 | 16              | 4   | -8  |

Supporting Information - Table 9. Regions showing differences in activations between Session 1 and Session 2 for letter > false font contrast in AR group

| Region                               | Volume (voxels) | Peak Z | p       | MNI coordinates |     |     |
|--------------------------------------|-----------------|--------|---------|-----------------|-----|-----|
|                                      |                 |        |         | x               | y   | z   |
| <b>Session 2 &gt; Session 1</b>      |                 |        |         |                 |     |     |
| Frontal lobe                         |                 |        |         |                 |     |     |
| L Inferior frontal, precentral gyrus | 738             | 3.02   | < 0.005 | -48             | 24  | 14  |
| L Precentral gyrus                   | 38              | 2.72   | < 0.005 | -20             | -24 | 58  |
| L Frontal pole                       | 15              | 2.49   | < 0.01  | -20             | 66  | 4   |
| L Frontal orbital cortex             | 15              | 2.41   | < 0.01  | -24             | 34  | -16 |
| R Precentral gyrus                   | 80              | 2.71   | < 0.005 | 56              | 8   | 24  |
|                                      | 15              | 2.64   | < 0.005 | 42              | -2  | 26  |
| R Frontal pole                       | 58              | 2.62   | < 0.005 | 16              | 36  | 42  |
| R Middle frontal gyrus               | 58              | 2.66   | < 0.005 | 38              | 16  | 30  |
| R Inferior frontal gyrus             | 26              | 2.61   | < 0.005 | 54              | 30  | 18  |
| R Frontal pole                       | 21              | 2.42   | < 0.01  | 40              | 50  | 12  |
| R Paracingulate cortex               | 16              | 2.50   | < 0.01  | 10              | 10  | 46  |
| R Superior frontal gyrus             | 15              | 2.48   | < 0.01  | 18              | -8  | 58  |
| L/R Anterior cingulate cortex        | 529             | 2.79   | < 0.005 | 6               | 30  | 12  |
| Temporal lobe                        |                 |        |         |                 |     |     |
| L Middle temporal gyrus              | 161             | 2.89   | < 0.005 | -66             | -42 | -10 |
|                                      | 32              | 3.09   | < 0.005 | -68             | -26 | -4  |
| L Superior temporal gyrus            | 29              | 2.72   | < 0.005 | -66             | -14 | -4  |
| R Inferior temporal gyrus            | 18              | 2.55   | < 0.01  | 54              | -42 | -18 |
| R Planum temporale                   | 14              | 2.54   | < 0.01  | 62              | -10 | 0   |
| R Temporal fusiform cortex           | 12              | 2.70   | < 0.005 | 26              | -2  | -40 |
| Parietal lobe                        |                 |        |         |                 |     |     |
| L Angular, supramarginal gyrus       | 164             | 2.93   | < 0.005 | -62             | -50 | 12  |
| L Postcentral gyrus                  | 109             | 2.79   | < 0.005 | -22             | -42 | 60  |
| L Postcentral gyrus                  | 64              | 2.66   | < 0.005 | -38             | -38 | 46  |
| L Superior parietal lobule           | 41              | 2.61   | < 0.005 | -28             | -56 | 54  |
| R Precuneous cortex                  | 170             | 2.81   | < 0.005 | 10              | -70 | 46  |
| R Postcentral gyrus                  | 112             | 2.79   | < 0.005 | 18              | -32 | 74  |
| R Postcentral gyrus                  | 15              | 2.48   | < 0.01  | 14              | -40 | 54  |
| R Angular gyrus                      | 36              | 2.65   | < 0.005 | 58              | -46 | 14  |
| R Superior parietal lobule           | 27              | 2.62   | < 0.005 | 38              | -46 | 60  |
| R Supramarginal gyrus                | 19              | 2.60   | < 0.005 | 54              | -46 | 38  |
| L/R Posterior cingulate gyrus        | 19              | 2.59   | < 0.005 | 4               | -40 | 26  |
| Occipital lobe                       |                 |        |         |                 |     |     |
| L Lateral occipital cortex           | 25              | 2.49   | < 0.01  | -48             | -72 | 12  |
|                                      | 10              | 2.47   | < 0.01  | -46             | -82 | 12  |
| L Cuneal cortex                      | 18              | 2.49   | < 0.01  | -4              | -74 | 26  |
| R Lingual gyrus                      | 142             | 2.74   | < 0.005 | 10              | -86 | -14 |
| R Lateral occipital cortex           | 18              | 2.65   | < 0.005 | 38              | -58 | 58  |
| Subcortical                          |                 |        |         |                 |     |     |
| L Putamen                            | 41              | 2.65   | < 0.005 | -18             | -8  | 14  |
|                                      | 17              | 2.65   | < 0.005 | -20             | 4   | 0   |
| L Thalamus                           | 15              | 2.57   | < 0.005 | -12             | -14 | 2   |
| R Putamen                            | 235             | 2.98   | < 0.005 | 22              | 0   | 10  |
|                                      | 16              | 2.50   | < 0.01  | 28              | -16 | 4   |
| <b>Session 1 &gt; Session 2</b>      |                 |        |         |                 |     |     |
| Temporal lobe                        |                 |        |         |                 |     |     |
| L Temporal pole                      | 30              | 2.57   | < 0.005 | -38             | 8   | -22 |
